# Supplementary material for: An acyltransferase gene that putatively functions in anthocyanin modification was horizontally transferred from Fabaceae into the genus Cuscuta
Source: PubMed Central journal article supplement — Plant Divers. 2016 Jun 8;38(3):149–55. doi: 10.1016/j.pld.2016.04.002 (PMC6112201; doi:10.1016/j.pld.2016.04.002), 2016-06-08
Supplement: mmc1.pdf [file mmc1.pdf]

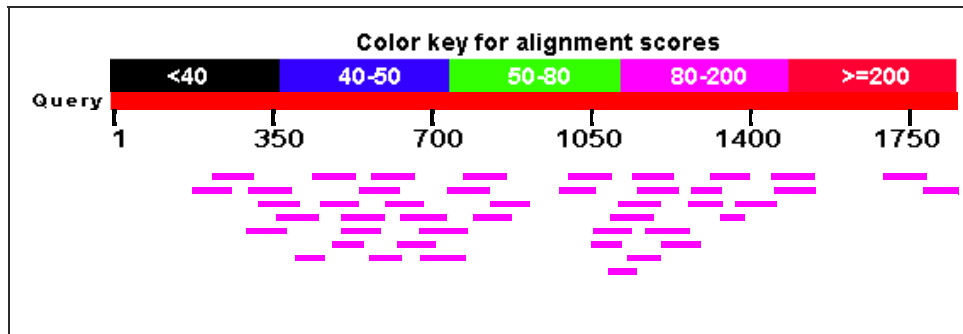

Supplementary File 1. **Blast search result of the putative foreign gene encoding CaATL (*Cuscuta australis* anthocyanin acyltransferases-like) in *C. australis* against the RNA-seq datasets of *C. pentagona*.** The CaATL cDNA was used as a query to search against the RNA-seq datasets of *C. pentagona* deposited in the NCBI SRA database using BLASTn with more than 94% identity. The short pink bars represent the mapped reads with 80-200 bit scores according to the color key.

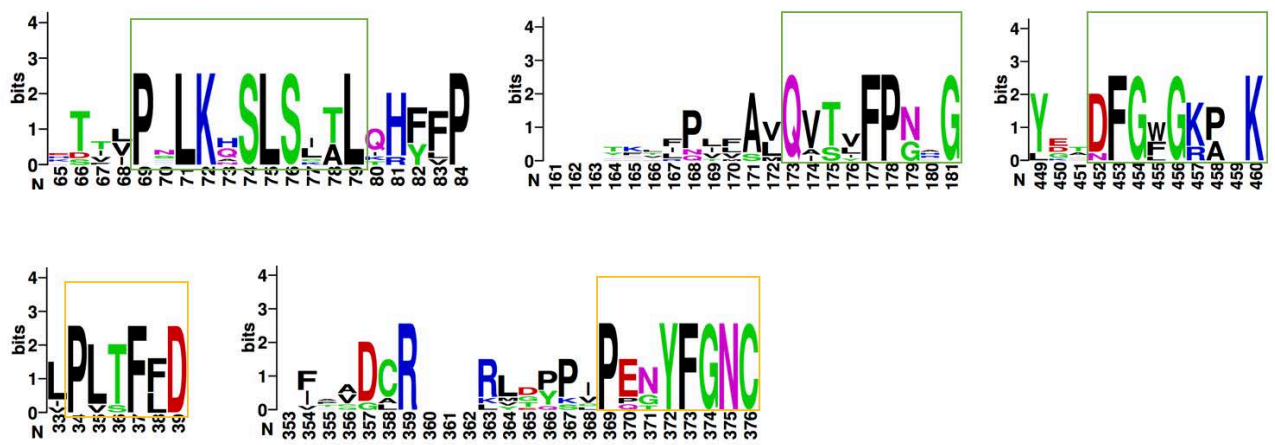

Supplementary File 2. **Weblogo displays of conserved and specific motifs of CaATL with its homologs.** The consensus sequences corresponding to the previous reported conserved motifs and specific motifs are in frames of green and yellow, respectively.
