# Supplementary material for: An acyltransferase gene that putatively functions in anthocyanin modification was horizontally transferred from Fabaceae into the genus Cuscuta
Source: PubMed Central journal article supplement — Plant Divers. 2016 Jun 8;38(3):149–55. doi: 10.1016/j.pld.2016.04.002 (PMC6112201; doi:10.1016/j.pld.2016.04.002), 2016-06-08
Supplement: mmc2.pdf [file mmc2.pdf]

Supplementary Table 1. Lineage and source information of representative plant species with genomes sequenced that were used to search the BAHF family proteins.

| Species                      | Taxonomy                                                                                                                                 | Source                                                                                                                                                                        |
|------------------------------|------------------------------------------------------------------------------------------------------------------------------------------|-------------------------------------------------------------------------------------------------------------------------------------------------------------------------------|
| <i>Actinidia chinensis</i>   | Mesangiospermae;eudicotyledons;Gunneridae;Pentapetalae;asterids;Ericales;Actinidiaceae;Actinidia                                         | <a href="http://bioinfo.tl.cornell.edu/cgi-bin/kiwi/download.cgi">http://bioinfo.tl.cornell.edu/cgi-bin/kiwi/download.cgi</a>                                                 |
| <i>Amborella trichopoda</i>  | basalMagnoliophyta;Amborellales;Amborellaceae;Amborella                                                                                  | <a href="http://plants.ensembl.org/species.html">http://plants.ensembl.org/species.html</a>                                                                                   |
| <i>Aquilegia coerulea</i>    | Mesangiospermae;eudicotyledons;stemEudicotyledons;Ranunculales;Ranunculaceae;Thalictridae;Aquilegia                                      | <a href="https://phytozome.jgi.doe.gov/pz/portal.html">https://phytozome.jgi.doe.gov/pz/portal.html</a>                                                                       |
| <i>Arabidopsis thaliana</i>  | Mesangiospermae;eudicotyledons;Gunneridae;Pentapetalae;rosids;malvids;Brassicales;Brassicaceae;Camelineae;Arabidopsis                    | <a href="https://phytozome.jgi.doe.gov/pz/portal.html">https://phytozome.jgi.doe.gov/pz/portal.html</a>                                                                       |
| <i>Beta vulgaris</i>         | Mesangiospermae;eudicotyledons;Gunneridae;Pentapetalae;Caryophyllales;Amaranthaceae;Betoideae;Beta                                       | <a href="http://bvsq.molgen.mpg.de/Genome/Download/RefBeet-1.2">http://bvsq.molgen.mpg.de/Genome/Download/RefBeet-1.2</a>                                                     |
| <i>Carica papaya</i>         | Mesangiospermae;eudicotyledons;Gunneridae;Pentapetalae;rosids;malvids;Brassicales;Caricaceae;Carica                                      | <a href="https://phytozome.jgi.doe.gov/pz/portal.html">https://phytozome.jgi.doe.gov/pz/portal.html</a>                                                                       |
| <i>Castanea mollissima</i>   | Mesangiospermae;eudicotyledons;Gunneridae;Pentapetalae;rosids;fabids;Fagales;Fagaceae;Castanea                                           | <a href="http://www.hardwoodgenomics.org/chinese-chestnut-genome#genomedownloads">http://www.hardwoodgenomics.org/chinese-chestnut-genome#genomedownloads</a>                 |
| <i>Citrullus lanatus</i>     | Mesangiospermae;eudicotyledons;Gunneridae;Pentapetalae;rosids;fabids;Cucurbitales;Cucurbitaceae;Benicaceae;Citrullus                     | <a href="http://www.icugi.org/cgi-bin/CuGI/genome/home.cgi?organism=watermelon&amp;ver=1">http://www.icugi.org/cgi-bin/CuGI/genome/home.cgi?organism=watermelon&amp;ver=1</a> |
| <i>Citrus sinensis</i>       | Mesangiospermae;eudicotyledons;Gunneridae;Pentapetalae;rosids;malvids;Sapindales;Rutaceae;Aurantioideae;Citrus                           | <a href="https://phytozome.jgi.doe.gov/pz/portal.html">https://phytozome.jgi.doe.gov/pz/portal.html</a>                                                                       |
| <i>Coffea canephora</i>      | Mesangiospermae;eudicotyledons;Gunneridae;Pentapetalae;asterids;lamiiids;Gentianales;Rubiaceae;Ixoroideae;Coffeae;Coffea                 | <a href="http://coffee-genome.org/download">http://coffee-genome.org/download</a>                                                                                             |
| <i>Cucumis sativus</i>       | Mesangiospermae;eudicotyledons;Gunneridae;Pentapetalae;rosids;fabids;Cucurbitales;Cucurbitaceae;Benicaceae;Cucumis                       | <a href="https://phytozome.jgi.doe.gov/pz/portal.html">https://phytozome.jgi.doe.gov/pz/portal.html</a>                                                                       |
| <i>Dianthus caryophyllus</i> | Mesangiospermae;eudicotyledons;Gunneridae;Pentapetalae;Caryophyllales;Caryophyllaceae;Dianthus                                           | <a href="ftp://ftp.kazusa.or.jp/pub/carnation/Gene_set/">ftp://ftp.kazusa.or.jp/pub/carnation/Gene_set/</a>                                                                   |
| <i>Erythranthe guttata</i>   | Mesangiospermae;eudicotyledons;Gunneridae;Pentapetalae;asterids;lamiiids;Lamiales;Phrymaceae;Erythranthe                                 | <a href="https://phytozome.jgi.doe.gov/pz/portal.html">https://phytozome.jgi.doe.gov/pz/portal.html</a>                                                                       |
| <i>Eucalyptus grandis</i>    | Mesangiospermae;eudicotyledons;Gunneridae;Pentapetalae;rosids;malvids;Myrtales;Myrtaceae;Myrtoideae;Eucalyptae;Eucalyptus                | <a href="https://phytozome.jgi.doe.gov/pz/portal.html">https://phytozome.jgi.doe.gov/pz/portal.html</a>                                                                       |
| <i>Eutrema salsugineum</i>   | Mesangiospermae;eudicotyledons;Gunneridae;Pentapetalae;rosids;malvids;Brassicales;Brassicaceae;Eutremaceae;Eutrema                       | <a href="https://phytozome.jgi.doe.gov/pz/portal.html">https://phytozome.jgi.doe.gov/pz/portal.html</a>                                                                       |
| <i>Fragaria vesca</i>        | Mesangiospermae;eudicotyledons;Gunneridae;Pentapetalae;rosids;fabids;Rosales;Rosaceae;Rosoidae;Potentilleae;Fragariinae;Fragaria         | <a href="https://phytozome.jgi.doe.gov/pz/portal.html">https://phytozome.jgi.doe.gov/pz/portal.html</a>                                                                       |
| <i>Gossypium raimondii</i>   | Mesangiospermae;eudicotyledons;Gunneridae;Pentapetalae;rosids;malvids;Malvales;Malvaceae;Malvoideae;Gossypium                            | <a href="https://phytozome.jgi.doe.gov/pz/portal.html">https://phytozome.jgi.doe.gov/pz/portal.html</a>                                                                       |
| <i>Ipomoea trifida</i>       | Mesangiospermae;eudicotyledons;Gunneridae;Pentapetalae;asterids;lamiiids;Solanales;Convolvulaceae;Ipomoeae;Ipomoea                       | <a href="http://sweetpotato-garden.kazusa.or.jp/">http://sweetpotato-garden.kazusa.or.jp/</a>                                                                                 |
| <i>Jatropha curcas</i>       | Mesangiospermae;eudicotyledons;Gunneridae;Pentapetalae;rosids;fabids;Malpighiales;Euphorbiaceae;Crotonoideae;Jatrophaeae;Jatropha        | <a href="ftp://ftp.kazusa.or.jp/pub/jatropha/">ftp://ftp.kazusa.or.jp/pub/jatropha/</a>                                                                                       |
| <i>Kalanchoe marnieriana</i> | Mesangiospermae;eudicotyledons;Gunneridae;Pentapetalae;Saxifragales;Crassulaceae;Kalanchoe                                               | <a href="https://phytozome.jgi.doe.gov/pz/portal.html">https://phytozome.jgi.doe.gov/pz/portal.html</a>                                                                       |
| <i>Linum usitatissimum</i>   | Mesangiospermae;eudicotyledons;Gunneridae;Pentapetalae;rosids;fabids;Malpighiales;Linaceae;Linum                                         | <a href="https://phytozome.jgi.doe.gov/pz/portal.html">https://phytozome.jgi.doe.gov/pz/portal.html</a>                                                                       |
| <i>Malus domestica</i>       | Mesangiospermae;eudicotyledons;Gunneridae;Pentapetalae;rosids;fabids;Rosales;Rosaceae;Maloidae;Maleae;Malus                              | <a href="https://phytozome.jgi.doe.gov/pz/portal.html">https://phytozome.jgi.doe.gov/pz/portal.html</a>                                                                       |
| <i>Medicago truncatula</i>   | Mesangiospermae;eudicotyledons;Gunneridae;Pentapetalae;rosids;fabids;Fabales;Fabaceae;Papilionoideae;Trifolieae;Medicago                 | <a href="https://phytozome.jgi.doe.gov/pz/portal.html">https://phytozome.jgi.doe.gov/pz/portal.html</a>                                                                       |
| <i>Morus notabilis</i>       | Mesangiospermae;eudicotyledons;Gunneridae;Pentapetalae;rosids;fabids;Rosales;Moraceae;Morus                                              | <a href="http://www.ncbi.nlm.nih.gov/genome/?term=Morus+notabilis">http://www.ncbi.nlm.nih.gov/genome/?term=Morus+notabilis</a>                                               |
| <i>Musa acuminata</i>        | Mesangiospermae;Liliopsida;Petrosaviidae;commelinids;Zingiberales;Musaceae;Musa                                                          | <a href="https://phytozome.jgi.doe.gov/pz/portal.html">https://phytozome.jgi.doe.gov/pz/portal.html</a>                                                                       |
| <i>Nelumbo nucifera</i>      | Mesangiospermae;eudicotyledons;stemEudicotyledons;Proteales;Nelumbonaceae;Nelumbo                                                        | <a href="http://lotus-db.wbgcas.cn/genome_download/sequence/">http://lotus-db.wbgcas.cn/genome_download/sequence/</a>                                                         |
| <i>Oryza sativa</i>          | Mesangiospermae;Liliopsida;Petrosaviidae;commelinids;Poales;Poaceae;BOPClade;Oryzoideae;Oryzaceae;Oryzinae;Oryza                         | <a href="http://plants.ensembl.org/species.html">http://plants.ensembl.org/species.html</a>                                                                                   |
| <i>Panicum virgatum</i>      | Mesangiospermae;Liliopsida;Petrosaviidae;commelinids;Poales;Poaceae;PACMADclade;Panicoideae;Panicoideae;Paniceae;Paniceae;Panicum        | <a href="https://phytozome.jgi.doe.gov/pz/portal.html">https://phytozome.jgi.doe.gov/pz/portal.html</a>                                                                       |
| <i>Phaseolus vulgaris</i>    | Mesangiospermae;eudicotyledons;Gunneridae;Pentapetalae;rosids;fabids;Fabales;Fabaceae;Papilionoideae;Phaseoleae;Phaseolus                | <a href="https://phytozome.jgi.doe.gov/pz/portal.html">https://phytozome.jgi.doe.gov/pz/portal.html</a>                                                                       |
| <i>Populus trichocarpa</i>   | Mesangiospermae;eudicotyledons;Gunneridae;Pentapetalae;rosids;fabids;Malpighiales;Salicaceae;Saliceae;Populus                            | <a href="https://phytozome.jgi.doe.gov/pz/portal.html">https://phytozome.jgi.doe.gov/pz/portal.html</a>                                                                       |
| <i>Ricinus communis</i>      | Mesangiospermae;eudicotyledons;Gunneridae;Pentapetalae;rosids;fabids;Euphorbiales;Euphorbiaceae;Acalyphoideae;Acalyphaeae;Ricinus        | <a href="https://phytozome.jgi.doe.gov/pz/portal.html">https://phytozome.jgi.doe.gov/pz/portal.html</a>                                                                       |
| <i>Sesamum indicum</i>       | Mesangiospermae;eudicotyledons;Gunneridae;Pentapetalae;asterids;lamiiids;Lamiales;Pedaliaceae;Sesamum                                    | <a href="http://ocri-genomics.org/Sinbase/login.htm">http://ocri-genomics.org/Sinbase/login.htm</a>                                                                           |
| <i>Solanum lycopersicum</i>  | Mesangiospermae;eudicotyledons;Gunneridae;Pentapetalae;asterids;lamiiids;Solanales;Solanaceae;Solanaceae;Solanaceae;Solanum;Lycopersicon | <a href="https://plants.ensembl.org/species.html">https://plants.ensembl.org/species.html</a>                                                                                 |
| <i>Spirodela polyrhiza</i>   | Mesangiospermae;Liliopsida;Alismatales;Araceae;Lemnoideae;Spirodela                                                                      | <a href="https://phytozome.jgi.doe.gov/pz/portal.html">https://phytozome.jgi.doe.gov/pz/portal.html</a>                                                                       |
| <i>Tarenaya hassleriana</i>  | Mesangiospermae;eudicotyledons;Gunneridae;Pentapetalae;rosids;malvids;Brassicales;Cleomaceae;Tarenaya                                    | <a href="http://www.ncbi.nlm.nih.gov/genome/?term=Tarenaya%20hassleriana">http://www.ncbi.nlm.nih.gov/genome/?term=Tarenaya%20hassleriana</a>                                 |
| <i>Vitis vinifera</i>        | Mesangiospermae;eudicotyledons;Gunneridae;Pentapetalae;rosids;rosids;Vitales;Vitaceae;Vitis                                              | <a href="http://plants.ensembl.org/species.html">http://plants.ensembl.org/species.html</a>                                                                                   |
| <i>Zea mays</i>              | Mesangiospermae;Liliopsida;Petrosaviidae;commelinids;Poales;Poaceae;PACMADclade;Panicoideae;Andropogonaeae;Andropogoneae;Tripsacinae     | <a href="http://plants.ensembl.org/species.html">http://plants.ensembl.org/species.html</a>                                                                                   |
